# Supplementary material
Source: HighWire-hosted journal article supplement (https://le.uwpress.org/highwire/filestream/2920/field_highwire_adjunct_files/1/LE-96-4-08-Parthum-appB.pdf)
Supplement: LE-96-4-08-Parthum-appB.pdf [file LE-96-4-08-Parthum-appB.pdf]

## Appendix B: Summary Statistics

**Table B1: Summary Statistics**

|                       | (1)<br>Respondents | (2)<br>mean | (3)<br>min | (4)<br>max |
|-----------------------|--------------------|-------------|------------|------------|
| Rural                 | 343                | 0.53        | 0          | 1          |
| Works in Agriculture  | 343                | 0.16        | 0          | 1          |
| Male                  | 343                | 0.32        | 0          | 1          |
| White                 | 343                | 0.78        | 0          | 1          |
| Homeowner             | 343                | 0.56        | 0          | 1          |
| Age                   |                    |             |            |            |
| 18 – 29 years old     | 343                | 0.25        | 0          | 1          |
| 30 – 44 years old     | 343                | 0.33        | 0          | 1          |
| 45 – 64 years old     | 343                | 0.30        | 0          | 1          |
| > 65 years old        | 343                | 0.12        | 0          | 1          |
| Annual income (\$k)   |                    |             |            |            |
| < \$25,000            | 343                | 0.24        | 0          | 1          |
| \$25,000 - \$34,999   | 343                | 0.16        | 0          | 1          |
| \$35,000 - \$49,999   | 343                | 0.16        | 0          | 1          |
| \$50,000 - \$74,999   | 343                | 0.20        | 0          | 1          |
| \$75,000 - \$99,999   | 343                | 0.13        | 0          | 1          |
| \$100,000 - \$149,999 | 343                | 0.07        | 0          | 1          |
| \$150,000 - \$199,999 | 343                | 0.02        | 0          | 1          |
| > \$200,000           | 343                | 0.01        | 0          | 1          |
| Education             |                    |             |            |            |
| Less than high school | 343                | 0.04        | 0          | 1          |
| High school / GED     | 343                | 0.24        | 0          | 1          |
| Some college          | 343                | 0.27        | 0          | 1          |
| Two-year degree       | 343                | 0.11        | 0          | 1          |
| Four-year degree      | 343                | 0.22        | 0          | 1          |
| Graduate degree       | 343                | 0.12        | 0          | 1          |
| Years of Residency    |                    |             |            |            |
| 0 to 5 years          | 343                | 0.06        | 0          | 1          |
| 5 to 10 years         | 343                | 0.04        | 0          | 1          |
| 10 to 20 years        | 343                | 0.17        | 0          | 1          |
| 20 to 30 years        | 343                | 0.20        | 0          | 1          |
| More than 30 years    | 343                | 0.53        | 0          | 1          |
| Minutes to Complete   | 343                | 10.49       | 3.52       | 321.82     |

**Note:** Experience categories range from 0 (never go) to 5 (more than 5 times per year). *Water Quality Issues* relates to their current understanding of the water quality concerns in the watershed, and ranges from 0 (not aware of any) to 4 (very aware and involved). *Algal Blooms* refers to the respondent’s current experience with algal blooms, and ranges from 0 (never see them) to 4 (very often, all the time).

**Table B2: Differences between Survey Respondents and U.S. Census (ACS)**

|                        | (1)<br>Sample | (2)<br>Census | (3)<br>Difference |
|------------------------|---------------|---------------|-------------------|
| Works in Agriculture   | 0.15 (0.00)   | 0.05 (0.03)   | -0.10*** (0.01)   |
| Male                   | 0.32 (0.00)   | 0.50 (0.04)   | 0.18*** (0.01)    |
| White                  | 0.77 (0.00)   | 0.94 (0.10)   | 0.16*** (0.02)    |
| Homeowner              | 0.57 (0.00)   | 0.75 (0.16)   | 0.18*** (0.03)    |
| Age                    |               |               |                   |
| 18 – 29 years old      | 0.22 (0.23)   | 0.18 (0.04)   | -0.05 (0.04)      |
| 30 – 44 years old      | 0.30 (0.31)   | 0.23 (0.04)   | -0.07 (0.06)      |
| 45 – 64 years old      | 0.36 (0.35)   | 0.38 (0.04)   | 0.02 (0.06)       |
| > 65 years old         | 0.12 (0.20)   | 0.21 (0.05)   | 0.09** (0.04)     |
| Household income (\$k) |               |               |                   |
| < \$25,000             | 0.06 (0.10)   | 0.12 (0.17)   | 0.07* (0.03)      |
| \$25,000 - \$34,999    | 0.01 (0.03)   | 0.07 (0.03)   | 0.07*** (0.01)    |
| \$35,000 - \$49,999    | 0.15 (0.24)   | 0.13 (0.08)   | -0.02 (0.04)      |
| \$50,000 - \$74,999    | 0.20 (0.31)   | 0.20 (0.06)   | 0.00 (0.06)       |
| \$75,000 - \$99,999    | 0.22 (0.31)   | 0.18 (0.07)   | -0.04 (0.06)      |
| \$100,000 - \$149,999  | 0.18 (0.27)   | 0.17 (0.07)   | -0.00 (0.05)      |
| \$150,000 - \$199,999  | 0.18 (0.22)   | 0.07 (0.05)   | -0.11*** (0.04)   |
| > \$200,000            | 0.01 (0.02)   | 0.04 (0.04)   | 0.04*** (0.01)    |
| Education              |               |               |                   |
| Less than high school  | 0.22 (0.29)   | 0.06 (0.04)   | -0.16*** (0.05)   |
| High school / GED      | 0.12 (0.27)   | 0.35 (0.09)   | 0.23*** (0.05)    |
| Some college           | 0.21 (0.22)   | 0.24 (0.04)   | 0.03 (0.04)       |
| Two-year degree        | 0.08 (0.21)   | 0.09 (0.02)   | 0.01 (0.04)       |
| Four-year degree       | 0.19 (0.20)   | 0.16 (0.07)   | -0.03 (0.04)      |
| Graduate degree        | 0.18 (0.33)   | 0.08 (0.07)   | -0.10 (0.06)      |
| Zip codes              | 42            | 42            | 42                |

Standard errors in parentheses

\*  $p < 0.05$ , \*\*  $p < 0.01$ , \*\*\*  $p < 0.001$

**Note:** Comparisons are provided between the 2017 American Community Survey (ACS) 5-year zip code level data and the sample in the choice experiment. Averages are across the 42 zip codes in the study area. Our sample is largely representative of the region, with a few differences. Our sample is more likely to work in agriculture; however, this is likely because of the broad wording of the question where we asked respondents if they or their family performed work related to agriculture, and results are consistent with this. Our sample is more likely to be female, less likely to be white, and less likely to be a homeowner. The age of respondents is representative of the U.S. Census, with fewer above the age of 65. Our sample has similar income and education levels.

**Table B3: Differences between Respondents in Rural and Urban Areas**

|                        | (1)           | (2)         | (3)            |
|------------------------|---------------|-------------|----------------|
|                        | Rural         | Urban       | Difference     |
| Works in Agriculture   | 0.19 (0.39)   | 0.12 (0.33) | -0.06 (0.04)   |
| Male                   | 0.32 (0.47)   | 0.32 (0.47) | -0.00 (0.05)   |
| White                  | 0.81 (0.40)   | 0.74 (0.44) | -0.07 (0.05)   |
| Homeowner              | 0.60 (0.49)   | 0.52 (0.50) | -0.08 (0.05)   |
| Age                    |               |             |                |
| 18 – 29 years old      | 0.24 (0.43)   | 0.27 (0.44) | 0.03 (0.05)    |
| 30 – 44 years old      | 0.36 (0.48)   | 0.29 (0.46) | -0.07 (0.05)   |
| 45 – 64 years old      | 0.28 (0.45)   | 0.32 (0.47) | 0.04 (0.05)    |
| > 65 years old         | 0.12 (0.32)   | 0.12 (0.32) | 0.00 (0.03)    |
| Household income (\$k) |               |             |                |
| < \$25,000             | 0.20 (0.40)   | 0.28 (0.45) | 0.08* (0.05)   |
| \$25,000 - \$34,999    | 0.19 (0.39)   | 0.14 (0.34) | -0.05 (0.04)   |
| \$35,000 - \$49,999    | 0.17 (0.38)   | 0.16 (0.36) | -0.02 (0.04)   |
| \$50,000 - \$74,999    | 0.19 (0.39)   | 0.20 (0.40) | 0.02 (0.04)    |
| \$75,000 - \$99,999    | 0.14 (0.35)   | 0.13 (0.34) | -0.01 (0.04)   |
| \$100,000 - \$149,999  | 0.09 (0.29)   | 0.05 (0.22) | -0.04 (0.03)   |
| \$150,000 - \$199,999  | 0.02 (0.13)   | 0.03 (0.17) | 0.01 (0.02)    |
| > \$200,000            | 0.01 (0.10)   | 0.01 (0.11) | 0.00 (0.01)    |
| Education              |               |             |                |
| Less than high school  | 0.03 (0.18)   | 0.04 (0.21) | 0.01 (0.02)    |
| High school / GED      | 0.27 (0.44)   | 0.21 (0.41) | -0.06 (0.05)   |
| Some college           | 0.31 (0.46)   | 0.22 (0.42) | -0.08* (0.05)  |
| Two-year degree        | 0.08 (0.27)   | 0.14 (0.35) | 0.07** (0.03)  |
| Four-year degree       | 0.22 (0.42)   | 0.22 (0.42) | 0.01 (0.05)    |
| Graduate degree        | 0.09 (0.29)   | 0.16 (0.36) | 0.06* (0.04)   |
| Years of Residency     |               |             |                |
| 0 to 5 years           | 0.04 (0.19)   | 0.09 (0.29) | 0.06** (0.03)  |
| 5 to 10 years          | 0.04 (0.19)   | 0.04 (0.21) | 0.01 (0.02)    |
| 10 to 20 years         | 0.15 (0.36)   | 0.18 (0.39) | 0.03 (0.04)    |
| 20 to 30 years         | 0.25 (0.43)   | 0.15 (0.36) | -0.10** (0.04) |
| More than 30 years     | 0.52 (0.50)   | 0.53 (0.50) | 0.01 (0.05)    |
| Experience             |               |             |                |
| Recreational Fishing   | 0.76 (1.36)   | 0.43 (1.08) | -0.32** (0.13) |
| Hiking/Biking Trails   | 1.34 (1.63)   | 1.03 (1.46) | -0.31* (0.17)  |
| Water Quality Issues   | 1.90 (1.27)   | 1.71 (1.21) | -0.18 (0.13)   |
| Algal Blooms           | 1.90 (1.27)   | 1.71 (1.21) | -0.18 (0.13)   |
| Minutes to Complete    | 11.14 (24.32) | 9.76 (7.42) | -1.38 (1.99)   |
| Respondents            | 182           | 161         | 343            |

Standard errors in parentheses

\*  $p < 0.05$ , \*\*  $p < 0.01$ , \*\*\*  $p < 0.001$
